# Supplementary material for: A Predictive Model for Guillain–Barré Syndrome Based on Ensemble Methods
Source: Hindawi journal article supplement (doi:10.1155/2018/1576927), 2018-11-05
Supplement: f1 [file 1576927.f1.pdf]

# Supplementary material

## 1. Experimental design

Table 4: Tuning the number of iterations for Boosting.

| Number of iterations | Average accuracy |
|----------------------|------------------|
| 10                   | 0.9126           |
| 20                   | 0.9159           |
| 30                   | 0.9171           |
| 40                   | 0.9181           |
| 50                   | <b>0.9195</b>    |
| 60                   | 0.9189           |
| 70                   | 0.9181           |
| 80                   | 0.9177           |
| 90                   | 0.9165           |
| 100                  | 0.9154           |

Table 5: Tuning the number of trees for Bagging.

| Number of trees | Average accuracy |
|-----------------|------------------|
| 10              | 0.8926           |
| 20              | 0.8935           |
| 30              | 0.8942           |
| 40              | 0.8951           |
| 50              | 0.8949           |
| 60              | 0.8953           |
| 70              | 0.8968           |
| 80              | 0.8972           |
| 90              | 0.8977           |
| 100             | <b>0.8980</b>    |

Table 6: Random subspace parameter tuning.

| Number of iterations | Subspace sample size |        |        |
|----------------------|----------------------|--------|--------|
|                      | 0.25                 | 0.5    | 0.75   |
| 10                   | 0.8780               | 0.8526 | 0.8438 |
| 20                   | 0.8731               | 0.8658 | 0.8341 |
| 30                   | 0.8780               | 0.8682 | 0.8341 |
| 40                   | 0.8804               | 0.8587 | 0.8365 |
| 50                   | <b>0.9016</b>        | 0.8574 | 0.8352 |
| 60                   | 0.9001               | 0.8568 | 0.8349 |
| 70                   | 0.8990               | 0.8557 | 0.8345 |
| 80                   | 0.8878               | 0.8547 | 0.8345 |
| 90                   | 0.8754               | 0.8539 | 0.8339 |
| 100                  | 0.8750               | 0.8525 | 0.8324 |

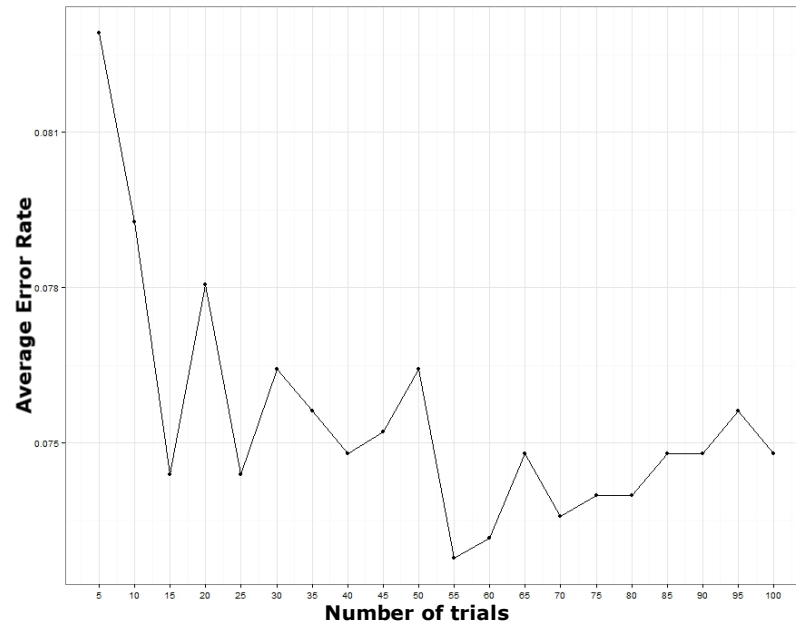

Figure 2: Number of trials optimization in C5.0.

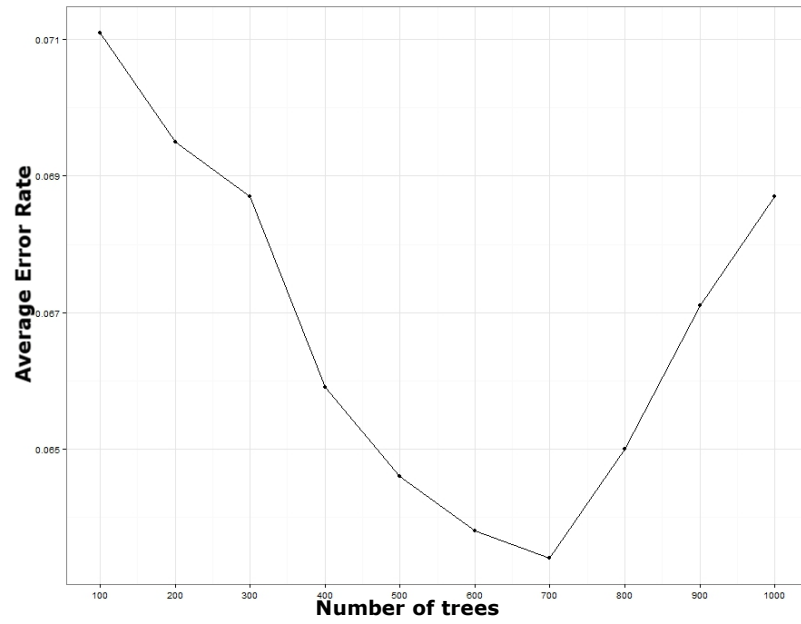

Figure 3: Number of trees optimization in Random forest.

## 2. Results

Table 7: Average accuracy of single classifiers and ensemble methods across 30 runs in four GBS subtype classification. Ensemble methods are shown in bold.

| Method                 | Average accuracy |
|------------------------|------------------|
| <b>Random forest</b>   | <b>0.9366</b>    |
| <b>C5.0</b>            | <b>0.9272</b>    |
| kNN                    | 0.9268           |
| <b>Boosting</b>        | <b>0.9195</b>    |
| SVMLap                 | 0.9163           |
| SVMPoly                | 0.9142           |
| SVMGaus                | 0.9126           |
| C4.5                   | 0.9114           |
| SVMLin                 | 0.9069           |
| <b>Random subspace</b> | <b>0.9016</b>    |
| Naive Bayes            | 0.9008           |
| <b>Bagging</b>         | <b>0.8980</b>    |
| MLP                    | 0.8915           |
| RBF-DDA                | 0.8882           |
| SLP                    | 0.8850           |
| JRip                   | 0.8837           |
| LDA                    | 0.8825           |
| MLR                    | 0.8793           |
| OneR                   | 0.7972           |

Table 8: Impact analysis of the 16 relevant features in the diagnostic model using single classifiers. Highest values are shown in bold.

| Single classifier       | Using 16 relevant features | Using all features | Difference    |
|-------------------------|----------------------------|--------------------|---------------|
| <b>Average Accuracy</b> |                            |                    |               |
| KNN                     | <b>0.9268</b>              | 0.8843             | 0.0425        |
| SVMLap                  | 0.9163                     | 0.8878             | 0.0285        |
| SVMPoly                 | 0.9142                     | 0.8692             | 0.0450        |
| SVMGaus                 | 0.9126                     | <b>0.8932</b>      | 0.0194        |
| C4.5                    | 0.9114                     | 0.8826             | 0.0288        |
| SVMLin                  | 0.9069                     | 0.8919             | 0.0150        |
| Naive Bayes             | 0.9008                     | 0.8607             | 0.0401        |
| MLP                     | 0.8915                     | 0.7317             | 0.1598        |
| RBF-DDA                 | 0.8882                     | 0.6731             | <b>0.2151</b> |
| SLP                     | 0.885                      | 0.8207             | 0.0643        |
| JRip                    | 0.8837                     | 0.8607             | 0.0230        |
| LDA                     | 0.8825                     | 0.8268             | 0.0557        |
| MLR                     | 0.8793                     | 0.7602             | 0.1191        |
| OneR                    | 0.7972                     | 0.7606             | 0.0366        |

Table 9: Impact analysis of the 16 relevant features in the diagnostic model using ensemble methods. Highest values are shown in bold.

| Ensemble method         | Using 16 relevant features | Using all features | Difference    |
|-------------------------|----------------------------|--------------------|---------------|
| <b>Average Accuracy</b> |                            |                    |               |
| Random forest           | <b>0.9366</b>              | 0.9163             | 0.0203        |
| C5.0                    | 0.9272                     | 0.9150             | 0.0122        |
| Boosting                | 0.9195                     | <b>0.9187</b>      | 0.0008        |
| Random subspace         | 0.9016                     | 0.7163             | <b>0.1853</b> |
| Bagging                 | 0.8980                     | 0.8979             | 0.0001        |

Table 10: Average results of ensemble methods across 30 runs in AIDP vs. ALL classification.

| Method                 | Balanced Accuracy | Accuracy      | Sensitivity   | Specificity   | Kappa         | AUC           |
|------------------------|-------------------|---------------|---------------|---------------|---------------|---------------|
| <b>C5.0</b>            | <b>0.8171</b>     | <b>0.9048</b> | <b>0.6944</b> | <b>0.9398</b> | <b>0.6266</b> | <b>0.8171</b> |
|                        | 0.0976            | 0.0556        | 0.1861        | 0.0565        | 0.1806        | 0.0976        |
| <b>Boosting</b>        | <b>0.8069</b>     | <b>0.8992</b> | <b>0.6907</b> | <b>0.9231</b> | <b>0.6046</b> | <b>0.8069</b> |
|                        | 0.0827            | 0.0479        | 0.1750        | 0.0732        | 0.1670        | 0.0827        |
| <b>Random forest</b>   | <b>0.7769</b>     | <b>0.9270</b> | <b>0.5667</b> | <b>0.9870</b> | <b>0.6407</b> | <b>0.7769</b> |
|                        | 0.0888            | 0.0306        | 0.1836        | 0.0289        | 0.1645        | 0.0888        |
| <b>Bagging</b>         | <b>0.7681</b>     | <b>0.8960</b> | <b>0.6093</b> | <b>0.9269</b> | <b>0.5629</b> | <b>0.7681</b> |
|                        | 0.0818            | 0.0466        | 0.1829        | 0.1091        | 0.1682        | 0.0818        |
| <b>Random subspace</b> | <b>0.6815</b>     | <b>0.9056</b> | <b>0.3666</b> | <b>0.9953</b> | <b>0.4661</b> | <b>0.6810</b> |
|                        | 0.1240            | 0.0351        | 0.2453        | 0.0129        | 0.2408        | 0.1218        |

Table 11: Balanced accuracy of single classifiers and ensemble methods across 30 runs in AIDP vs. ALL classification. Ensemble methods are shown in bold.

| Method                 | Balanced Accuracy |
|------------------------|-------------------|
| kNN                    | 0.8227            |
| <b>C5.0</b>            | <b>0.8171</b>     |
| <b>Boosting</b>        | <b>0.8069</b>     |
| C4.5                   | 0.8042            |
| MLP                    | 0.8014            |
| SVMLap                 | 0.8009            |
| <b>Random forest</b>   | <b>0.7769</b>     |
| <b>Bagging</b>         | <b>0.7681</b>     |
| RBF-DDA                | 0.7648            |
| SLP                    | 0.7551            |
| SVMLin                 | 0.7542            |
| LDA                    | 0.7537            |
| SVMGaus                | 0.7491            |
| JRip                   | 0.7407            |
| SVMPoly                | 0.7389            |
| Naive Bayes            | 0.7231            |
| BLR                    | 0.7181            |
| <b>Random subspace</b> | <b>0.6815</b>     |
| OneR                   | 0.6222            |

Table 12: Average results of ensemble methods across 30 runs in AMAN vs. ALL classification.

| Method                 | Balanced Accuracy | Accuracy      | Sensitivity   | Specificity   | Kappa         | AUC           |
|------------------------|-------------------|---------------|---------------|---------------|---------------|---------------|
| <b>Boosting</b>        | <b>0.9214</b>     | <b>0.9341</b> | <b>0.8989</b> | <b>0.9439</b> | <b>0.8384</b> | <b>0.9214</b> |
|                        | 0.0599            | 0.0441        | 0.1045        | 0.0591        | 0.1098        | 0.0599        |
| <b>Random subspace</b> | <b>0.9138</b>     | <b>0.9143</b> | <b>0.9112</b> | <b>0.9155</b> | <b>0.7992</b> | <b>0.9133</b> |
|                        | 0.0449            | 0.0418        | 0.0788        | 0.0545        | 0.0926        | 0.0442        |
| <b>C5.0</b>            | <b>0.9136</b>     | <b>0.9302</b> | <b>0.8750</b> | <b>0.9522</b> | <b>0.8290</b> | <b>0.9136</b> |
|                        | 0.0487            | 0.0385        | 0.0948        | 0.0461        | 0.0911        | 0.0487        |
| <b>Random forest</b>   | <b>0.9033</b>     | <b>0.9214</b> | <b>0.8611</b> | <b>0.9456</b> | <b>0.8069</b> | <b>0.9033</b> |
|                        | 0.0550            | 0.0406        | 0.1057        | 0.0424        | 0.1006        | 0.0550        |
| <b>Bagging</b>         | <b>0.8542</b>     | <b>0.8952</b> | <b>0.7872</b> | <b>0.9211</b> | <b>0.7303</b> | <b>0.8542</b> |
|                        | 0.0727            | 0.0462        | 0.1624        | 0.0929        | 0.1313        | 0.0727        |

Table 13: Balanced accuracy of single classifiers and ensemble methods across 30 runs in AMAN vs. ALL classification. Ensemble methods are shown in bold.

| Method                 | Balanced Accuracy |
|------------------------|-------------------|
| kNN                    | 0.9356            |
| SVMGaus                | 0.9256            |
| <b>Boosting</b>        | <b>0.9214</b>     |
| SVMPoly                | 0.9203            |
| SVMLap                 | 0.9181            |
| <b>Random subspace</b> | <b>0.9138</b>     |
| <b>C5.0</b>            | <b>0.9136</b>     |
| C4.5                   | 0.9067            |
| <b>Random forest</b>   | <b>0.9033</b>     |
| MLP                    | 0.8978            |
| SVMLin                 | 0.8969            |
| SLP                    | 0.8778            |
| Naive Bayes            | 0.8700            |
| RBF-DDA                | 0.8689            |
| LDA                    | 0.8594            |
| <b>Bagging</b>         | <b>0.8542</b>     |
| JRip                   | 0.8472            |
| BLR                    | 0.8214            |
| OneR                   | 0.6336            |



Table 14: Average results of ensemble methods across 30 runs in AMSAN vs. ALL classification.

| Method                 | Balanced Accuracy | Accuracy      | Sensitivity   | Specificity   | Kappa         | AUC           |
|------------------------|-------------------|---------------|---------------|---------------|---------------|---------------|
| <b>Random forest</b>   | <b>0.8924</b>     | <b>0.8960</b> | <b>0.8544</b> | <b>0.9304</b> | <b>0.7889</b> | <b>0.8924</b> |
|                        | 0.0429            | 0.0417        | 0.0814        | 0.0621        | 0.0849        | 0.0429        |
| <b>Boosting</b>        | <b>0.8786</b>     | <b>0.8810</b> | <b>0.8671</b> | <b>0.8902</b> | <b>0.7591</b> | <b>0.8786</b> |
|                        | 0.0386            | 0.0375        | 0.0663        | 0.0796        | 0.0762        | 0.0386        |
| <b>C5.0</b>            | <b>0.8782</b>     | <b>0.8810</b> | <b>0.8491</b> | <b>0.9072</b> | <b>0.7588</b> | <b>0.8782</b> |
|                        | 0.0494            | 0.0480        | 0.0779        | 0.0532        | 0.0978        | 0.0494        |
| <b>Random subspace</b> | <b>0.8688</b>     | <b>0.8722</b> | <b>0.8617</b> | <b>0.8798</b> | <b>0.7425</b> | <b>0.8708</b> |
|                        | 0.0410            | 0.0440        | 0.0550        | 0.0664        | 0.0878        | 0.0416        |
| <b>Bagging</b>         | <b>0.8555</b>     | <b>0.8587</b> | <b>0.8365</b> | <b>0.8744</b> | <b>0.7137</b> | <b>0.8555</b> |
|                        | 0.0526            | 0.0515        | 0.0960        | 0.1012        | 0.1047        | 0.0526        |

Table 15: Balanced accuracy of single classifiers and ensemble methods across 30 runs in AMSAN vs. ALL classification. Ensemble methods are shown in bold.

| Method                 | Balanced accuracy |
|------------------------|-------------------|
| <i>k</i> NN            | 0.8953            |
| <b>Random forest</b>   | <b>0.8924</b>     |
| C4.5                   | 0.8852            |
| <b>Boosting</b>        | <b>0.8786</b>     |
| <b>C5.0</b>            | <b>0.8782</b>     |
| SVMLap                 | 0.8756            |
| RBF-DDA                | 0.8695            |
| <b>Random subspace</b> | <b>0.8688</b>     |
| SLP                    | 0.8644            |
| <b>Bagging</b>         | <b>0.8555</b>     |
| SVMPoly                | 0.8504            |
| SVMGaus                | 0.8492            |
| MLP                    | 0.8490            |
| JRip                   | 0.8449            |
| OneR                   | 0.8219            |
| Naive Bayes            | 0.8166            |
| SVMLin                 | 0.8101            |
| LDA                    | 0.8072            |
| BLR                    | 0.7971            |

Table 16: Average results of ensemble methods across 30 train-test runs in MF vs. ALL classification.

| Method                 | Balanced Accuracy | Accuracy      | Sensitivity   | Specificity   | Kappa         | AUC           |
|------------------------|-------------------|---------------|---------------|---------------|---------------|---------------|
| <b>Random subspace</b> | <b>0.8471</b>     | <b>0.9333</b> | <b>0.7500</b> | <b>0.9525</b> | <b>0.6413</b> | <b>0.8513</b> |
|                        | 0.1067            | 0.0296        | 0.2274        | 0.0349        | 0.1509        | 0.1074        |
| <b>Bagging</b>         | <b>0.8342</b>     | <b>0.9024</b> | <b>0.7675</b> | <b>0.9009</b> | <b>0.5498</b> | <b>0.8342</b> |
|                        | 0.1298            | 0.0513        | 0.2460        | 0.1297        | 0.2213        | 0.1298        |
| <b>C5.0</b>            | <b>0.8048</b>     | <b>0.9167</b> | <b>0.6667</b> | <b>0.9430</b> | <b>0.5601</b> | <b>0.8048</b> |
|                        | 0.1329            | 0.0487        | 0.2653        | 0.0484        | 0.2145        | 0.1329        |
| <b>Boosting</b>        | <b>0.7572</b>     | <b>0.9183</b> | <b>0.5697</b> | <b>0.9447</b> | <b>0.5022</b> | <b>0.7572</b> |
|                        | 0.1346            | 0.0323        | 0.2802        | 0.0881        | 0.2085        | 0.1346        |
| <b>Random forest</b>   | <b>0.7463</b>     | <b>0.9254</b> | <b>0.5250</b> | <b>0.9675</b> | <b>0.4973</b> | <b>0.7463</b> |
|                        | 0.1519            | 0.0311        | 0.3104        | 0.0246        | 0.2599        | 0.1519        |

Table 17: Balanced accuracy of single classifiers and ensemble methods across 30 train-test runs in MF vs. ALL classification. Ensemble methods are shown in bold.

| Method                 | Balanced Accuracy |
|------------------------|-------------------|
| Naive Bayes            | 0.8939            |
| <b>Random subspace</b> | <b>0.8471</b>     |
| <b>Bagging</b>         | <b>0.8342</b>     |
| <b>C5.0</b>            | <b>0.8048</b>     |
| LDA                    | 0.7818            |
| C4.5                   | 0.7691            |
| <b>Boosting</b>        | <b>0.7572</b>     |
| JRip                   | 0.7678            |
| SVMGaus                | 0.7581            |
| <b>Random forest</b>   | <b>0.7463</b>     |
| BLR                    | 0.7316            |
| SVMLin                 | 0.7221            |
| MLP                    | 0.7193            |
| SVMPoly                | 0.7086            |
| SLP                    | 0.6875            |
| OneR                   | 0.6853            |
| SVMLap                 | 0.6664            |
| kNN                    | 0.6539            |
| RBF-DDA                | 0.5042            |

Table 18: Average results of ensemble methods across 30 runs in AIDP vs. AMAN classification. Standard deviation of each metric is shown in normal font.

| Method          | Balanced Accuracy       | Accuracy                | Sensitivity             | Specificity             | Kappa                   | AUC                     |
|-----------------|-------------------------|-------------------------|-------------------------|-------------------------|-------------------------|-------------------------|
| Bagging         | <b>0.9597</b><br>0.0458 | <b>0.9630</b><br>0.0395 | <b>0.9472</b><br>0.0861 | <b>0.9722</b><br>0.0551 | <b>0.9171</b><br>0.0882 | <b>0.9597</b><br>0.0458 |
| C5.0            | <b>0.9597</b><br>0.0530 | <b>0.9611</b><br>0.0487 | <b>0.9556</b><br>0.0868 | <b>0.9639</b><br>0.0566 | <b>0.9139</b><br>0.1078 | <b>0.9597</b><br>0.0530 |
| Boosting        | <b>0.9486</b><br>0.0473 | <b>0.9556</b><br>0.0397 | <b>0.9278</b><br>0.0895 | <b>0.9694</b><br>0.0599 | <b>0.8997</b><br>0.0889 | <b>0.9486</b><br>0.0473 |
| Random subspace | <b>0.9325</b><br>0.0887 | <b>0.9444</b><br>0.0652 | <b>0.8833</b><br>0.1703 | <b>0.9751</b><br>0.0445 | <b>0.8683</b><br>0.1589 | <b>0.9292</b><br>0.0890 |
| Random forest   | <b>0.9097</b><br>0.0805 | <b>0.9315</b><br>0.0540 | <b>0.8444</b><br>0.1747 | <b>0.9750</b><br>0.0497 | <b>0.8368</b><br>0.1348 | <b>0.9097</b><br>0.0805 |

Table 19: Balanced accuracy of single classifiers and ensemble methods across 30 runs in AIDP vs. AMAN classification. Ensemble methods are shown in bold.

| Method                 | Balanced Accuracy |
|------------------------|-------------------|
| JRip                   | 0.9639            |
| <b>Bagging</b>         | <b>0.9597</b>     |
| <b>C5.0</b>            | <b>0.9597</b>     |
| OneR                   | 0.9583            |
| <b>Boosting</b>        | <b>0.9486</b>     |
| C4.5                   | 0.9458            |
| SVMLin                 | 0.9347            |
| SLP                    | 0.9333            |
| MLP                    | 0.9333            |
| <b>Random subspace</b> | <b>0.9325</b>     |
| Naive Bayes            | 0.9278            |
| SVMLap                 | 0.9125            |
| <b>Random forest</b>   | <b>0.9097</b>     |
| SVMGaus                | 0.9014            |
| RBF-DDA                | 0.8958            |
| SVMPoly                | 0.8722            |
| kNN                    | 0.8639            |
| BLR                    | 0.8542            |
| LDA                    | 0.8389            |

Table 20: Average results of ensemble methods across 30 runs in AIDP vs. AMSAN classification. Standard deviation of each metric is shown in normal font.

| Method                 | Balanced Accuracy | Balanced Accuracy | Sensitivity   | Specificity   | Kappa         | AUC           |
|------------------------|-------------------|-------------------|---------------|---------------|---------------|---------------|
| <b>Random forest</b>   | <b>0.9102</b>     | <b>0.9387</b>     | <b>0.8556</b> | <b>0.9649</b> | <b>0.8312</b> | <b>0.9102</b> |
|                        | 0.0588            | 0.0430            | 0.1136        | 0.0485        | 0.1137        | 0.0588        |
| <b>Boosting</b>        | <b>0.8972</b>     | <b>0.9160</b>     | <b>0.8532</b> | <b>0.9412</b> | <b>0.7797</b> | <b>0.8972</b> |
|                        | 0.0609            | 0.0539            | 0.1032        | 0.0623        | 0.1308        | 0.0609        |
| <b>Bagging</b>         | <b>0.8854</b>     | <b>0.9067</b>     | <b>0.8480</b> | <b>0.9228</b> | <b>0.7565</b> | <b>0.8854</b> |
|                        | 0.0774            | 0.0675            | 0.1211        | 0.0798        | 0.1635        | 0.0774        |
| <b>C5.0</b>            | <b>0.8683</b>     | <b>0.8893</b>     | <b>0.8278</b> | <b>0.9088</b> | <b>0.7095</b> | <b>0.8683</b> |
|                        | 0.0755            | 0.0563            | 0.1348        | 0.0569        | 0.1434        | 0.0755        |
| <b>Random subspace</b> | <b>0.8674</b>     | <b>0.9093</b>     | <b>0.7834</b> | <b>0.9491</b> | <b>0.7459</b> | <b>0.8662</b> |
|                        | 0.0755            | 0.0481            | 0.1524        | 0.0544        | 0.1324        | 0.0744        |

Table 21: Balanced accuracy of single classifiers and ensemble methods across 30 runs in AIDP vs. AMSAN classification. Ensemble methods are shown in bold.

| Method                 | Balanced Accuracy |
|------------------------|-------------------|
| <b>Random forest</b>   | <b>0.9102</b>     |
| SVMLap                 | 0.9061            |
| SVMPoly                | 0.8990            |
| <b>Boosting</b>        | <b>0.8972</b>     |
| MLP                    | 0.8949            |
| SVMGaus                | 0.8931            |
| SVMLin                 | 0.8928            |
| kNN                    | 0.8899            |
| <b>Bagging</b>         | <b>0.8854</b>     |
| SLP                    | 0.8841            |
| Naive Bayes            | 0.8728            |
| C4.5                   | 0.8692            |
| <b>C5.0</b>            | <b>0.8683</b>     |
| <b>Random subspace</b> | <b>0.8674</b>     |
| JRip                   | 0.8588            |
| BLR                    | 0.8423            |
| RBFD                   | 0.8339            |
| OneR                   | 0.8316            |
| LDA                    | 0.7836            |

Table 22: Average results of ensemble methods across 30 runs in AIDP vs. MF classification. Standard deviation of each metric is shown in normal font.

| Method          | Balanced Accuracy | Accuracy         | Sensitivity      | Specificity      | Kappa            | AUC              |
|-----------------|-------------------|------------------|------------------|------------------|------------------|------------------|
| Random subspace | 0.8951<br>0.0673  | 0.8733<br>0.0785 | 0.7944<br>0.1288 | 0.9917<br>0.0456 | 0.7527<br>0.1494 | 0.8930<br>0.0671 |
| Bagging         | 0.8750<br>0.1089  | 0.8533<br>0.1167 | 0.8333<br>0.1578 | 0.9167<br>0.1681 | 0.7158<br>0.2223 | 0.8806<br>0.0867 |
| Random forest   | 0.8306<br>0.0847  | 0.8267<br>0.0785 | 0.8111<br>0.1366 | 0.8500<br>0.1925 | 0.6460<br>0.1626 | 0.8306<br>0.0847 |
| C5.0            | 0.8014<br>0.1167  | 0.7967<br>0.0999 | 0.7778<br>0.1337 | 0.8250<br>0.2555 | 0.5820<br>0.2221 | 0.8014<br>0.1167 |
| Adaboost        | 0.7694<br>0.1275  | 0.7767<br>0.1165 | 0.7167<br>0.2037 | 0.8222<br>0.2303 | 0.5333<br>0.2337 | 0.7806<br>0.0996 |

Table 23: Balanced accuracy of single classifiers and ensemble methods across 30 runs in AIDP vs. MF classification. Ensemble methods are shown in bold.

| Method                 | Balanced Accuracy |
|------------------------|-------------------|
| <b>Random subspace</b> | <b>0.8951</b>     |
| <b>Bagging</b>         | <b>0.8750</b>     |
| OneR                   | 0.8667            |
| JRip                   | 0.8528            |
| kNN                    | 0.8417            |
| MLP                    | 0.8347            |
| Naive Bayes            | 0.8319            |
| <b>Random forest</b>   | <b>0.8306</b>     |
| C4.5                   | 0.8236            |
| SVMGaus                | 0.8222            |
| SVMPoly                | 0.8069            |
| SVMLap                 | 0.8028            |
| <b>C5.0</b>            | <b>0.8014</b>     |
| SLP                    | 0.7708            |
| <b>Boosting</b>        | <b>0.7694</b>     |
| SVMLin                 | 0.7542            |
| RBF-DDA                | 0.7042            |
| LDA                    | 0.6250            |
| BLR                    | 0.6111            |

Table 24: Average results of ensemble methods across 30 runs in AMAN vs. AMSAN classification. Standard deviation of each metric is shown in normal font.

| Method                 | Balanced Accuracy | Accuracy      | Sensitivity   | Specificity   | Kappa         | AUC           |
|------------------------|-------------------|---------------|---------------|---------------|---------------|---------------|
| <b>Random forest</b>   | <b>0.9474</b>     | <b>0.9505</b> | <b>0.9333</b> | <b>0.9614</b> | <b>0.8950</b> | <b>0.9474</b> |
|                        | 0.0415            | 0.0347        | 0.0859        | 0.0389        | 0.0752        | 0.0415        |
| <b>Random subspace</b> | <b>0.9390</b>     | <b>0.9473</b> | <b>0.9057</b> | <b>0.9736</b> | <b>0.8872</b> | <b>0.9396</b> |
|                        | 0.0420            | 0.0344        | 0.0840        | 0.0359        | 0.0752        | 0.0414        |
| <b>Boosting</b>        | <b>0.9284</b>     | <b>0.9355</b> | <b>0.9216</b> | <b>0.9352</b> | <b>0.8625</b> | <b>0.9284</b> |
|                        | 0.0464            | 0.0397        | 0.0689        | 0.0960        | 0.0865        | 0.0464        |
| <b>C5.0</b>            | <b>0.9242</b>     | <b>0.9290</b> | <b>0.9028</b> | <b>0.9456</b> | <b>0.8505</b> | <b>0.9242</b> |
|                        | 0.0651            | 0.0625        | 0.0981        | 0.0725        | 0.1293        | 0.0651        |
| <b>Bagging</b>         | <b>0.8940</b>     | <b>0.8989</b> | <b>0.8877</b> | <b>0.9003</b> | <b>0.7879</b> | <b>0.8940</b> |
|                        | 0.0648            | 0.0632        | 0.0768        | 0.1065        | 0.1327        | 0.0648        |

Table 25: Balanced accuracy of single classifiers and ensemble methods across 30 runs in AMAN vs. AMSAN classification. Ensemble methods are shown in bold.

| Method                 | Balanced accuracy |
|------------------------|-------------------|
| $k$ NN                 | 0.9588            |
| <b>Random forest</b>   | <b>0.9474</b>     |
| SVMLap                 | 0.9406            |
| <b>Random subspace</b> | <b>0.9390</b>     |
| MLP                    | 0.9344            |
| <b>Boosting</b>        | <b>0.9284</b>     |
| RBF-DDA                | 0.9265            |
| <b>C5.0</b>            | <b>0.9242</b>     |
| SVMGaus                | 0.9236            |
| SLP                    | 0.9202            |
| SVMPoly                | 0.9189            |
| C4.5                   | 0.9138            |
| SVMLin                 | 0.9125            |
| Naive Bayes            | 0.9091            |
| <b>Bagging</b>         | <b>0.8940</b>     |
| LDA                    | 0.8838            |
| JRip                   | 0.8827            |
| BLR                    | 0.8559            |
| OneR                   | 0.8437            |

Table 26: Average results of ensemble methods across 30 runs in AMAN vs. MF classification. Standard deviation of each metric is shown in normal font.

| Method                 | Balanced Accuracy | Accuracy      | Sensitivity   | Specificity   | Kappa         | AUC           |
|------------------------|-------------------|---------------|---------------|---------------|---------------|---------------|
| <b>Random forest</b>   | <b>0.9333</b>     | <b>0.9625</b> | <b>0.9917</b> | <b>0.8750</b> | <b>0.8908</b> | <b>0.9333</b> |
|                        | 0.0838            | 0.0452        | 0.0335        | 0.1706        | 0.1346        | 0.0838        |
| <b>Bagging</b>         | <b>0.9181</b>     | <b>0.9313</b> | <b>0.9611</b> | <b>0.8750</b> | <b>0.8214</b> | <b>0.9181</b> |
|                        | 0.0705            | 0.0502        | 0.0811        | 0.1431        | 0.1271        | 0.0705        |
| <b>Boosting</b>        | <b>0.9167</b>     | <b>0.9417</b> | <b>0.9639</b> | <b>0.8694</b> | <b>0.8449</b> | <b>0.9201</b> |
|                        | 0.0922            | 0.0655        | 0.0779        | 0.1662        | 0.1888        | 0.0967        |
| <b>C5.0</b>            | <b>0.9069</b>     | <b>0.9313</b> | <b>0.9556</b> | <b>0.8583</b> | <b>0.8201</b> | <b>0.9069</b> |
|                        | 0.0802            | 0.0664        | 0.0750        | 0.1421        | 0.1619        | 0.0802        |
| <b>Random subspace</b> | <b>0.7543</b>     | <b>0.8708</b> | <b>0.9917</b> | <b>0.5083</b> | <b>0.5749</b> | <b>0.7500</b> |
|                        | 0.1227            | 0.0567        | 0.0253        | 0.2583        | 0.2123        | 0.1228        |

Table 27: Balanced accuracy of single classifiers and ensemble methods across 30 in AMAN vs. MF classification. Ensemble methods are shown in bold.

| Method                 | Balanced Accuracy |
|------------------------|-------------------|
| SVMGaus                | 0.9542            |
| SVMLap                 | 0.9542            |
| RBF-DDA                | 0.9528            |
| Naive Bayes            | 0.9486            |
| SVMLin                 | 0.9431            |
| kNN                    | 0.9417            |
| SVMPoly                | 0.9375            |
| <b>Random forest</b>   | <b>0.9333</b>     |
| <b>Bagging</b>         | <b>0.9181</b>     |
| <b>Boosting</b>        | <b>0.9167</b>     |
| MLP                    | 0.9125            |
| <b>C5.0</b>            | <b>0.9069</b>     |
| SLP                    | 0.9056            |
| LDA                    | 0.9056            |
| C4.5                   | 0.8889            |
| BLR                    | 0.8833            |
| oneR                   | 0.8806            |
| JRip                   | 0.8792            |
| <b>Random subspace</b> | <b>0.7543</b>     |

Table 28: Average results of ensemble methods across 30 runs in AMSAN vs. MF classification. Standard deviation of each metric is shown in normal font.

| Method               | Balanced Accuracy | Balanced Accuracy | Sensitivity   | Specificity   | Kappa         | AUC           |
|----------------------|-------------------|-------------------|---------------|---------------|---------------|---------------|
| Random subspace      | <b>0.8879</b>     | <b>0.8928</b>     | <b>0.8964</b> | <b>0.8750</b> | <b>0.6786</b> | <b>0.8857</b> |
|                      | 0.0862            | 0.0556            | 0.0561        | 0.1574        | 0.1590        | 0.0855        |
| <b>C5.0</b>          | <b>0.8651</b>     | <b>0.9130</b>     | <b>0.9386</b> | <b>0.7917</b> | <b>0.7032</b> | <b>0.8651</b> |
|                      | 0.0898            | 0.0379            | 0.0480        | 0.1979        | 0.1272        | 0.0898        |
| <b>Bagging</b>       | <b>0.8645</b>     | <b>0.8957</b>     | <b>0.8961</b> | <b>0.8329</b> | <b>0.7195</b> | <b>0.8978</b> |
|                      | 0.1789            | 0.1749            | 0.1869        | 0.2177        | 0.2482        | 0.0757        |
| <b>Random forest</b> | <b>0.8539</b>     | <b>0.9217</b>     | <b>0.9579</b> | <b>0.7500</b> | <b>0.7113</b> | <b>0.8539</b> |
|                      | 0.1061            | 0.0418            | 0.0350        | 0.2177        | 0.1727        | 0.1061        |
| <b>Boosting</b>      | <b>0.8246</b>     | <b>0.9058</b>     | <b>0.9364</b> | <b>0.7127</b> | <b>0.6519</b> | <b>0.8246</b> |
|                      | 0.1155            | 0.0458            | 0.0717        | 0.2463        | 0.1888        | 0.1155        |



Table 29: Balanced accuracy of single classifiers and ensemble methods across 30 runs in AMSAN vs. MF classification. Ensemble methods are shown in bold.

| Method                 | Balanced Accuracy |
|------------------------|-------------------|
| Naive Bayes            | 0.8980            |
| <b>Random subspace</b> | <b>0.8879</b>     |
| LDA                    | 0.8656            |
| <b>C5.0</b>            | <b>0.8651</b>     |
| <b>Bagging</b>         | <b>0.8645</b>     |
| MLP                    | 0.8588            |
| <b>Random forest</b>   | <b>0.8539</b>     |
| SLP                    | 0.8493            |
| SVMGaus                | 0.8480            |
| SVMLap                 | 0.8316            |
| JRip                   | 0.8248            |
| <b>Boosting</b>        | <b>0.8246</b>     |
| $k$ NN                 | 0.8099            |
| BLR                    | 0.8042            |
| C4.5                   | 0.8026            |
| SVMLin                 | 0.8013            |
| SVMPoly                | 0.7974            |
| OneR                   | 0.7811            |
| RBF-DDA                | 0.6757            |
